# Supplementary material
Source: publisher figshare collection journal article supplement (https://tandf.figshare.com/ndownloader/files/14701532)
Supplement: Supplementary file 1 [file 14701532]

**Supplementary Table A1: Actual and Predicted Levels of Urbanization**

| Year | Country | Urban population (% of total) | Predicted urbanization | Actual-Predicted | Conservative? |
| --- | --- | --- | --- | --- | --- |
| 1991 | China | 27.31 | 28.74 | -1.43 | Yes |
| 1992 | China | 28.20 | 29.62 | -1.42 | Yes |
| 1993 | China | 29.10 | 30.54 | -1.43 | Yes |
| 1994 | China | 30.02 | 31.47 | -1.45 | Yes |
| 1995 | China | 30.96 | 32.38 | -1.42 | Yes |
| 1996 | China | 31.92 | 33.28 | -1.36 | Yes |
| 1997 | China | 32.88 | 33.72 | -0.83 | Yes |
| 1998 | China | 33.87 | 33.64 | 0.22 | No |
| 1999 | China | 34.87 | 34.06 | 0.80 | No |
| 2000 | China | 35.88 | 34.57 | 1.31 | No |
| 2001 | China | 37.09 | 35.57 | 1.52 | No |
| 2002 | China | 38.43 | 36.68 | 1.74 | No |
| 2003 | China | 39.78 | 38.39 | 1.38 | No |
| 2004 | China | 41.14 | 40.19 | 0.96 | No |
| 2005 | China | 42.52 | 42.19 | 0.33 | No |
| 2006 | China | 43.87 | 44.45 | -0.58 | Yes |
| 2007 | China | 45.20 | 47.07 | -1.87 | Yes |
| 2008 | China | 46.54 | 49.28 | -2.74 | Yes |
| 2009 | China | 47.88 | 51.10 | -3.22 | Yes |
| 2010 | China | 49.23 | 53.25 | -4.02 | Yes |
| 2011 | China | 50.57 | 55.84 | -5.26 | Yes |
| 2012 | China | 51.89 | 57.77 | -5.88 | Yes |
| 2013 | China | 53.17 | 59.78 | -6.62 | Yes |
| 2014 | China | 54.41 | 61.80 | -7.39 | Yes |
| 2015 | China | 55.61 | 63.83 | -8.22 | Yes |
| 2016 | China | 56.78 | 65.89 | -9.12 | Yes |
| 1991 | India | 25.78 | 23.97 | 1.81 | No |
| 1992 | India | 25.98 | 24.04 | 1.94 | No |
| 1993 | India | 26.19 | 24.10 | 2.09 | No |
| 1994 | India | 26.40 | 24.68 | 1.72 | No |
| 1995 | India | 26.61 | 25.27 | 1.33 | No |
| 1996 | India | 26.82 | 24.94 | 1.87 | No |
| 1997 | India | 27.03 | 25.47 | 1.56 | No |
| 1998 | India | 27.24 | 25.11 | 2.13 | No |
| 1999 | India | 27.45 | 25.77 | 1.68 | No |
| 2000 | India | 27.67 | 26.30 | 1.37 | No |
| 2001 | India | 27.92 | 25.93 | 1.99 | No |
| 2002 | India | 28.24 | 26.46 | 1.78 | No |
| 2003 | India | 28.57 | 27.12 | 1.45 | No |
| 2004 | India | 28.90 | 28.27 | 0.63 | No |
| 2005 | India | 29.24 | 29.01 | 0.22 | No |
| 2006 | India | 29.57 | 29.78 | -0.21 | No |
| 2007 | India | 29.91 | 30.59 | -0.68 | No |
| 2008 | India | 30.25 | 31.16 | -0.92 | Yes |
| 2009 | India | 30.59 | 31.95 | -1.36 | Yes |
| 2010 | India | 30.93 | 32.86 | -1.93 | Yes |
| 2011 | India | 31.28 | 34.54 | -3.26 | Yes |
| 2012 | India | 31.63 | 34.78 | -3.15 | Yes |
| 2013 | India | 31.99 | 35.08 | -3.08 | Yes |
| 2014 | India | 32.37 | 35.93 | -3.56 | Yes |
| 2015 | India | 32.75 | 36.85 | -4.11 | Yes |
| 2016 | India | 33.14 | 37.27 | -4.13 | Yes |
| 1991 | Indonesia | 31.61 | 33.25 | -1.64 | Yes |
| 1992 | Indonesia | 32.70 | 33.59 | -0.89 | Yes |
| 1993 | Indonesia | 33.81 | 35.35 | -1.55 | Yes |
| 1994 | Indonesia | 34.93 | 37.69 | -2.75 | Yes |
| 1995 | Indonesia | 36.08 | 39.17 | -3.10 | Yes |
| 1996 | Indonesia | 37.24 | 39.73 | -2.49 | Yes |
| 1997 | Indonesia | 38.41 | 40.96 | -2.56 | Yes |
| 1998 | Indonesia | 39.59 | 38.16 | 1.43 | No |
| 1999 | Indonesia | 40.79 | 38.58 | 2.21 | No |
| 2000 | Indonesia | 42.00 | 38.40 | 3.61 | No |
| 2001 | Indonesia | 42.78 | 39.52 | 3.26 | No |
| 2002 | Indonesia | 43.57 | 39.32 | 4.24 | No |
| 2003 | Indonesia | 44.35 | 38.69 | 5.66 | No |
| 2004 | Indonesia | 45.15 | 39.96 | 5.18 | No |
| 2005 | Indonesia | 45.94 | 40.84 | 5.09 | No |
| 2006 | Indonesia | 46.73 | 42.19 | 4.54 | No |
| 2007 | Indonesia | 47.53 | 43.18 | 4.35 | No |
| 2008 | Indonesia | 48.33 | 44.15 | 4.18 | No |
| 2009 | Indonesia | 49.12 | 44.52 | 4.60 | No |
| 2010 | Indonesia | 49.92 | 45.56 | 4.36 | No |
| 2011 | Indonesia | 50.71 | 47.57 | 3.14 | No |
| 2012 | Indonesia | 51.49 | 48.18 | 3.31 | No |
| 2013 | Indonesia | 52.25 | 49.23 | 3.02 | No |
| 2014 | Indonesia | 53.00 | 50.70 | 2.30 | No |
| 2015 | Indonesia | 53.74 | 51.24 | 2.50 | No |
| 2016 | Indonesia | 54.47 | 51.83 | 2.63 | No |
| 1991 | Brazil | 74.69 | 70.21 | 4.48 | No |
| 1992 | Brazil | 75.44 | 69.52 | 5.92 | No |
| 1993 | Brazil | 76.18 | 70.45 | 5.73 | No |
| 1994 | Brazil | 76.90 | 72.09 | 4.81 | No |
| 1995 | Brazil | 77.61 | 73.48 | 4.13 | No |
| 1996 | Brazil | 78.30 | 74.61 | 3.69 | No |
| 1997 | Brazil | 79.05 | 75.22 | 3.83 | No |
| 1998 | Brazil | 79.78 | 75.27 | 4.51 | No |
| 1999 | Brazil | 80.50 | 74.44 | 6.06 | No |
| 2000 | Brazil | 81.19 | 77.67 | 3.52 | No |
| 2001 | Brazil | 81.55 | 76.73 | 4.82 | No |
| 2002 | Brazil | 81.88 | 77.32 | 4.56 | No |
| 2003 | Brazil | 82.20 | 77.27 | 4.93 | No |
| 2004 | Brazil | 82.52 | 78.87 | 3.65 | No |
| 2005 | Brazil | 82.83 | 79.61 | 3.22 | No |
| 2006 | Brazil | 83.14 | 81.15 | 1.99 | No |
| 2007 | Brazil | 83.45 | 83.56 | -0.11 | Yes |
| 2008 | Brazil | 83.75 | 85.68 | -1.93 | Yes |
| 2009 | Brazil | 84.04 | 85.68 | -1.63 | Yes |
| 2010 | Brazil | 84.34 | 88.43 | -4.09 | Yes |
| 2011 | Brazil | 84.62 | 90.25 | -5.62 | Yes |
| 2012 | Brazil | 84.90 | 91.17 | -6.27 | Yes |
| 2013 | Brazil | 85.17 | 92.14 | -6.97 | Yes |
| 2014 | Brazil | 85.43 | 91.96 | -6.52 | Yes |
| 2015 | Brazil | 85.69 | 89.88 | -4.19 | Yes |
| 2016 | Brazil | 85.93 | 87.47 | -1.54 | Yes |
| 1991 | Pakistan | 30.83 | 31.90 | -1.07 | Yes |
| 1992 | Pakistan | 31.08 | 32.05 | -0.97 | Yes |
| 1993 | Pakistan | 31.33 | 32.02 | -0.69 | Yes |
| 1994 | Pakistan | 31.58 | 31.12 | 0.46 | No |
| 1995 | Pakistan | 31.84 | 32.13 | -0.29 | Yes |
| 1996 | Pakistan | 32.09 | 32.20 | -0.11 | Yes |
| 1997 | Pakistan | 32.35 | 33.09 | -0.74 | Yes |
| 1998 | Pakistan | 32.61 | 31.69 | 0.92 | No |
| 1999 | Pakistan | 32.87 | 31.73 | 1.14 | No |
| 2000 | Pakistan | 33.16 | 31.80 | 1.36 | No |
| 2001 | Pakistan | 33.45 | 31.79 | 1.66 | No |
| 2002 | Pakistan | 33.75 | 34.63 | -0.88 | Yes |
| 2003 | Pakistan | 34.07 | 34.72 | -0.65 | Yes |
| 2004 | Pakistan | 34.39 | 34.44 | -0.04 | Yes |
| 2005 | Pakistan | 34.73 | 34.64 | 0.09 | No |
| 2006 | Pakistan | 35.08 | 34.80 | 0.28 | No |
| 2007 | Pakistan | 35.44 | 34.91 | 0.54 | No |
| 2008 | Pakistan | 35.82 | 34.43 | 1.39 | No |
| 2009 | Pakistan | 36.20 | 34.45 | 1.75 | No |
| 2010 | Pakistan | 36.60 | 34.43 | 2.16 | No |
| 2011 | Pakistan | 37.01 | 34.46 | 2.55 | No |
| 2012 | Pakistan | 37.43 | 34.52 | 2.91 | No |
| 2013 | Pakistan | 37.86 | 34.61 | 3.25 | No |
| 2014 | Pakistan | 38.30 | 35.19 | 3.12 | No |
| 2015 | Pakistan | 38.76 | 35.30 | 3.46 | No |
| 2016 | Pakistan | 39.22 | 35.93 | 3.30 | No |
| 1991 | Nigeria | 30.18 | 33.27 | -3.09 | Yes |
| 1992 | Nigeria | 30.68 | 33.16 | -2.48 | Yes |
| 1993 | Nigeria | 31.18 | 32.66 | -1.48 | Yes |
| 1994 | Nigeria | 31.69 | 32.58 | -0.89 | Yes |
| 1995 | Nigeria | 32.21 | 32.44 | -0.24 | Yes |
| 1996 | Nigeria | 32.73 | 32.56 | 0.16 | No |
| 1997 | Nigeria | 33.25 | 32.58 | 0.67 | No |
| 1998 | Nigeria | 33.77 | 32.12 | 1.65 | No |
| 1999 | Nigeria | 34.30 | 32.48 | 1.82 | No |
| 2000 | Nigeria | 34.84 | 33.55 | 1.29 | No |
| 2001 | Nigeria | 35.67 | 33.18 | 2.49 | No |
| 2002 | Nigeria | 36.51 | 31.84 | 4.67 | No |
| 2003 | Nigeria | 37.36 | 33.18 | 4.17 | No |
| 2004 | Nigeria | 38.21 | 36.79 | 1.42 | No |
| 2005 | Nigeria | 39.07 | 36.38 | 2.69 | No |
| 2006 | Nigeria | 39.94 | 36.79 | 3.15 | No |
| 2007 | Nigeria | 40.82 | 36.65 | 4.17 | No |
| 2008 | Nigeria | 41.70 | 38.81 | 2.90 | No |
| 2009 | Nigeria | 42.59 | 41.03 | 1.56 | No |
| 2010 | Nigeria | 43.48 | 46.15 | -2.67 | Yes |
| 2011 | Nigeria | 44.36 | 46.82 | -2.46 | Yes |
| 2012 | Nigeria | 45.23 | 46.96 | -1.73 | Yes |
| 2013 | Nigeria | 46.09 | 47.68 | -1.59 | Yes |
| 2014 | Nigeria | 46.94 | 48.50 | -1.56 | Yes |
| 2015 | Nigeria | 47.78 | 48.50 | -0.72 | Yes |
| 2016 | Nigeria | 48.60 | 47.60 | 0.99 | No |
| 1991 | Bangladesh | 20.26 | 24.40 | -4.14 | Yes |
| 1992 | Bangladesh | 20.61 | 24.44 | -3.83 | Yes |
| 1993 | Bangladesh | 20.97 | 24.48 | -3.52 | Yes |
| 1994 | Bangladesh | 21.33 | 24.51 | -3.19 | Yes |
| 1995 | Bangladesh | 21.69 | 24.57 | -2.87 | Yes |
| 1996 | Bangladesh | 22.06 | 24.61 | -2.54 | Yes |
| 1997 | Bangladesh | 22.44 | 24.65 | -2.21 | Yes |
| 1998 | Bangladesh | 22.82 | 25.17 | -2.36 | Yes |
| 1999 | Bangladesh | 23.20 | 25.22 | -2.02 | Yes |
| 2000 | Bangladesh | 23.59 | 25.29 | -1.70 | Yes |
| 2001 | Bangladesh | 24.10 | 26.75 | -2.66 | Yes |
| 2002 | Bangladesh | 24.76 | 29.13 | -4.38 | Yes |
| 2003 | Bangladesh | 25.43 | 29.20 | -3.77 | Yes |
| 2004 | Bangladesh | 26.11 | 29.74 | -3.63 | Yes |
| 2005 | Bangladesh | 26.81 | 31.26 | -4.45 | Yes |
| 2006 | Bangladesh | 27.52 | 31.38 | -3.87 | Yes |
| 2007 | Bangladesh | 28.24 | 31.53 | -3.29 | Yes |
| 2008 | Bangladesh | 28.97 | 31.66 | -2.69 | Yes |
| 2009 | Bangladesh | 29.71 | 31.77 | -2.06 | Yes |
| 2010 | Bangladesh | 30.46 | 31.90 | -1.44 | Yes |
| 2011 | Bangladesh | 31.23 | 32.52 | -1.30 | Yes |
| 2012 | Bangladesh | 31.99 | 33.16 | -1.17 | Yes |
| 2013 | Bangladesh | 32.75 | 33.79 | -1.04 | Yes |
| 2014 | Bangladesh | 33.52 | 34.43 | -0.91 | Yes |
| 2015 | Bangladesh | 34.28 | 35.10 | -0.82 | Yes |
| 2016 | Bangladesh | 35.04 | 35.80 | -0.76 | Yes |

Source: World Bank (2016) and Author’s analyses
